# Supplementary material for: Pseudomonas aeruginosa Strain 91: A Multifaceted Biocontrol Agent against Banana Fusarium Wilt
Source: MDPI journal article supplement (doi:10.3390/jof9111047), 2023-10-25
Supplement: s1 [file s1]

**Table S1.** Media used in this study.

| Media Name                              | Composition                          | Quantity |
|-----------------------------------------|--------------------------------------|----------|
| Nutrient Agar                           | Peptone                              | 5 g      |
|                                         | Beef extract                         | 3 g      |
|                                         | Sodium chloride                      | 5 g      |
|                                         | Agar                                 | 18 g     |
|                                         | Ultrapure water                      | 1000 mL  |
| Potato Dextrose Agar                    | Potato                               | 200 g    |
|                                         | Dextrose                             | 20 g     |
|                                         | Agar                                 | 18 g     |
|                                         | Ultrapure water                      | 1000 mL  |
| Luria Bertani Agar                      | Yeast extract                        | 5 g      |
|                                         | Peptone                              | 10 g     |
|                                         | NaCl                                 | 10 g     |
|                                         | Agar                                 | 18 g     |
|                                         | Ultrapure water                      | 1000 mL  |
| Dworkin and Foster Salts Minimal Medium | Glucose                              | 2 g      |
|                                         | Gluconic acid                        | 2 g      |
|                                         | Citric acid                          | 2 g      |
|                                         | KH <sub>2</sub> PO <sub>4</sub>      | 4 g      |
|                                         | Na <sub>2</sub> HPO <sub>4</sub>     | 6 g      |
|                                         | MgSO <sub>4</sub> .7H <sub>2</sub> O | 0.2 g    |
|                                         | CaCl <sub>2</sub>                    | 0.2 g    |

|                            |                                      |         |
|----------------------------|--------------------------------------|---------|
|                            | FeSO <sub>4</sub> .7H <sub>2</sub> O | 0.2 g   |
|                            | H <sub>3</sub> BO <sub>3</sub>       | 0.015 g |
|                            | ZnSO <sub>4</sub> .7H <sub>2</sub> O | 0.02 g  |
|                            | Na <sub>2</sub> MoO <sub>4</sub>     | 0.01 g  |
|                            | KI                                   | 0.01 g  |
|                            | NaBr                                 | 0.01 g  |
|                            | MnCl <sub>2</sub>                    | 0.01 g  |
|                            | COCl <sub>2</sub>                    | 0.005 g |
|                            | CuCl <sub>2</sub>                    | 0.005 g |
|                            | AlCl <sub>3</sub>                    | 0.002 g |
|                            | NiSO <sub>4</sub>                    | 0.002 g |
|                            | Ultrapure water                      | 1000 mL |
| <b>Yeast Mannitol Agar</b> | Mannitol                             | 15 g    |
|                            | K <sub>2</sub> HPO <sub>4</sub>      | 0.5 g   |
|                            | Yeast extract                        | 0.4 g   |
|                            | MgSO <sub>4</sub> .7H <sub>2</sub> O | 0.2 g   |
|                            | NaCl                                 | 0.1 g   |
|                            | Agar                                 | 15 g    |
|                            | Ultrapure water                      | 1000 mL |
| <b>Pikovskaya's Agar</b>   | Yeast extract                        | 0.5 g   |
|                            | Dextrose                             | 10 g    |
|                            | Calcium phosphate                    | 5 g     |
|                            | Ammonium sulphate                    | 0.5 g   |
|                            | Potassium chloride                   | 0.2 g   |

|                             |                                                                                    |          |
|-----------------------------|------------------------------------------------------------------------------------|----------|
|                             | Magnesium sulphate                                                                 | 0.1 g    |
|                             | Manganese sulphate                                                                 | 0.0001 g |
|                             | Ferrous sulphate                                                                   | 0.0001 g |
|                             | Agar                                                                               | 15 g     |
|                             | Ultrapure water                                                                    | 1000 mL  |
| <b>Yeast Extract Medium</b> | Yeast extract                                                                      | 5 g      |
|                             | Dextrose                                                                           | 20 g     |
|                             | Agar                                                                               | 18 g     |
|                             | 1000×trace element                                                                 | 1 mL     |
| <b>1000×Trace Element</b>   | ZnSO <sub>4</sub> ·7H <sub>2</sub> O                                               | 2.2 g    |
|                             | H <sub>3</sub> BO <sub>3</sub>                                                     | 1.1 g    |
|                             | MnCl <sub>2</sub> ·4H <sub>2</sub> O                                               | 0.5 g    |
|                             | FeSO <sub>4</sub> ·7H <sub>2</sub> O                                               | 0.5 g    |
|                             | CoCl <sub>2</sub> ·5H <sub>2</sub> O                                               | 0.16 g   |
|                             | CuSO <sub>4</sub>                                                                  | 0.16 g   |
|                             | (NH <sub>4</sub> ) <sub>6</sub> Mo <sub>7</sub> O <sub>24</sub> ·4H <sub>2</sub> O | 0.11 g   |
|                             | EDTA                                                                               | 5.0 g    |
|                             | Ultrapure water                                                                    | 100 mL   |

**Table S2.** List of carbon sources utilized by *Pseudomonas aeruginosa* 91 in GENIII BIOLOG<sup>R</sup> plate.

| S. No. | Carbon Source                |
|--------|------------------------------|
| 1      | Dextrin                      |
| 2      | D-Turanose                   |
| 3      | D-Raffinose                  |
| 4      | D-Salicin                    |
| 5      | N-Acetyl-D-Glucosamine       |
| 6      | N-Acetyl-D-Galactosamine     |
| 7      | N-AcetylNeuraminic Acid      |
| 8      | D-Fructose                   |
| 9      | D-Galactose                  |
| 10     | 3-Methyl Glucose             |
| 11     | D-Fucose                     |
| 12     | L-Fucose                     |
| 13     | Inosine                      |
| 14     | D-Sorbitol                   |
| 15     | D-Mannitol                   |
| 16     | D-Arabitol                   |
| 17     | myo-Inositol                 |
| 18     | Glycerol                     |
| 19     | D-Glucose-6-PO <sub>4</sub>  |
| 20     | D-Fructose-6-PO <sub>4</sub> |
| 21     | D-Aspartic Acid              |

---

|    |                    |
|----|--------------------|
| 22 | D-Serine           |
| 23 | Glycyl-L-Proline   |
| 24 | L-Alanine          |
| 25 | L-Arginine         |
| 26 | L-Aspartic Acid    |
| 27 | L-Glutamic Acid    |
| 28 | L-Histidine        |
| 29 | L-Serine           |
| 30 | Lincomycin         |
| 31 | Niaproof 4         |
| 32 | Pectin             |
| 33 | D-Gluconic Acid    |
| 34 | D-Glucuronic Acid  |
| 35 | Glucuronamide      |
| 36 | Mucic Acid         |
| 37 | Quinic Acid        |
| 38 | Tetrazolium Violet |
| 39 | Tetrazolium Blue   |
| 40 | L-Lactic Acid      |

---

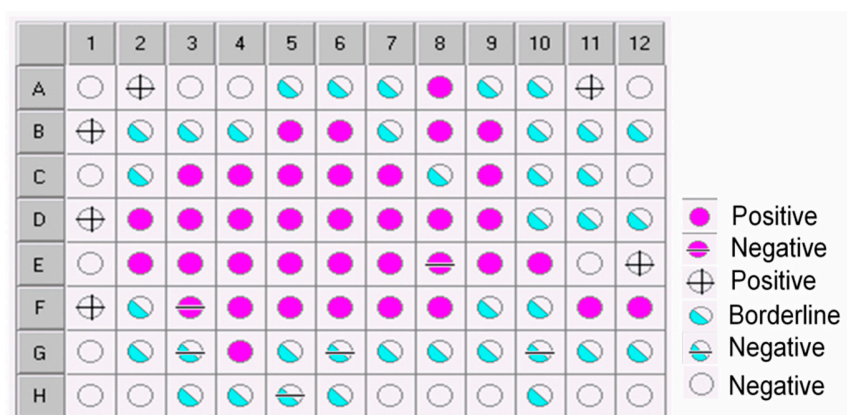

**Figure S1.** Carbon substrate utilization pattern of isolate 91 on GNIII Biolog<sup>R</sup> plate.
